# Supplementary material for: Feasibility Analysis of Offshore Wind Power Projects in the Caribbean Region of Colombia: A Case Study Using FAHP–GIS
Source: MDPI journal article supplement (doi:10.3390/su152416620), 2023-12-06
Supplement: s1 [file s1]

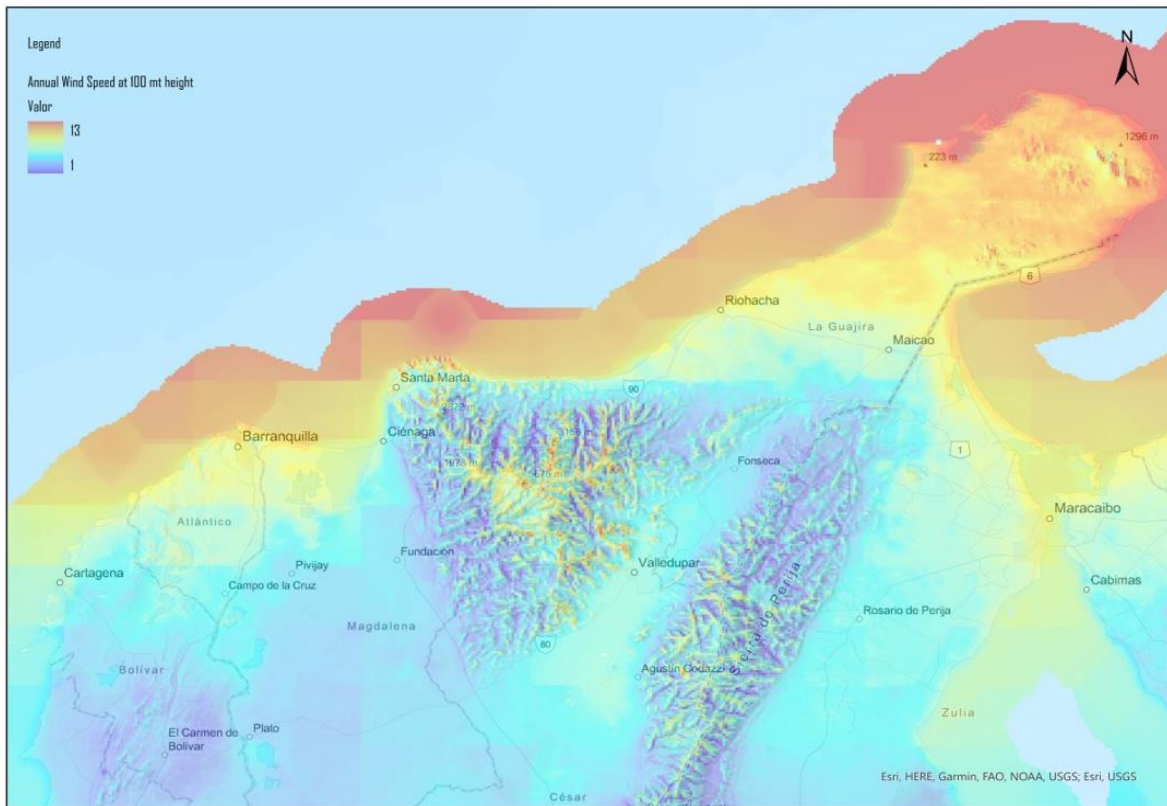

Figure S1. Win speed map.

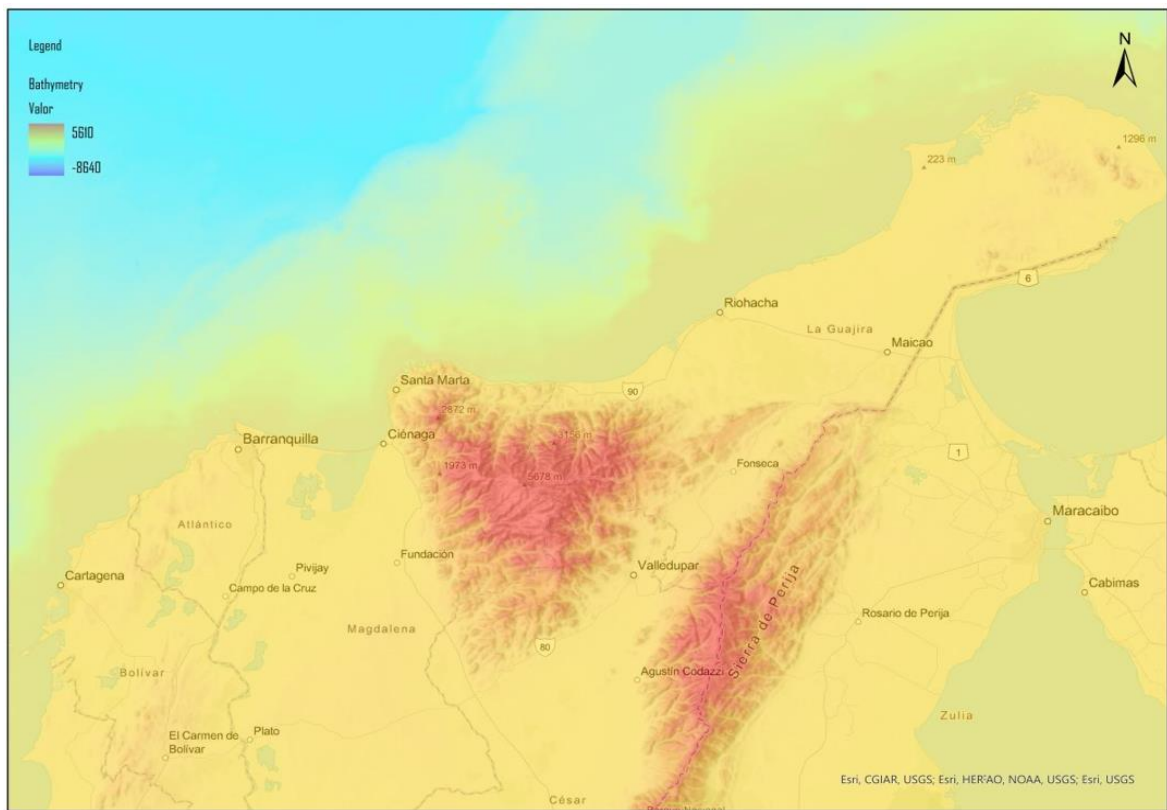

Figure S2. Bathymetry map.

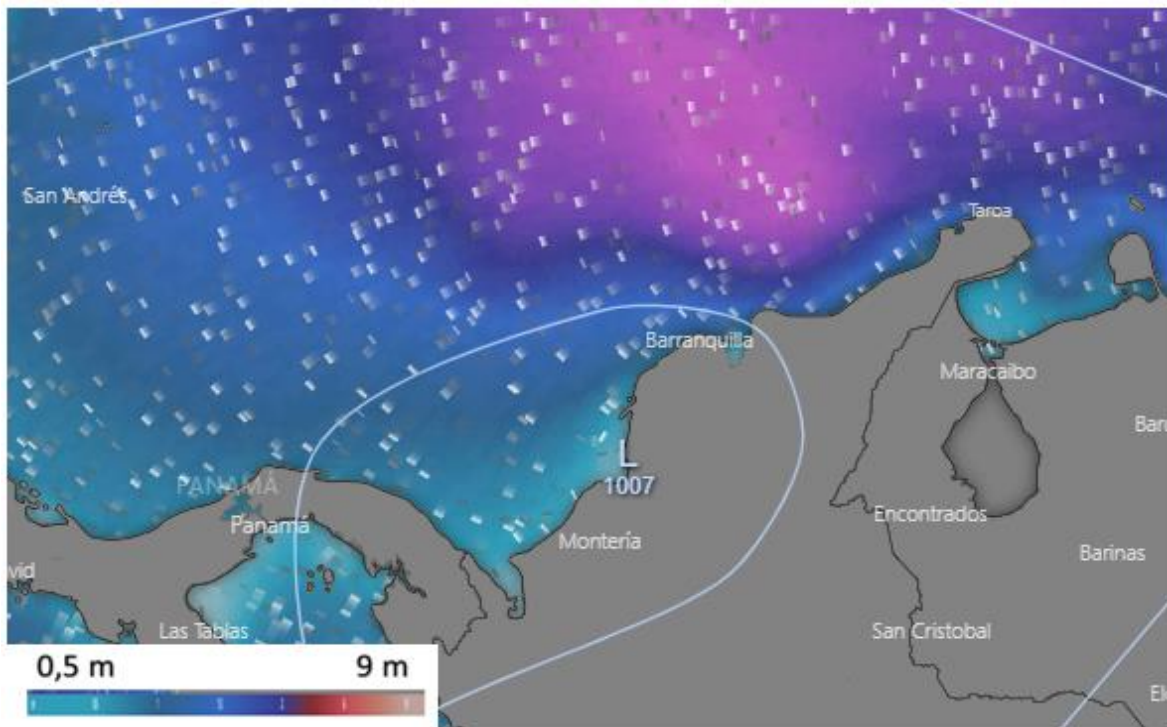

Figure S3. Wave height map.

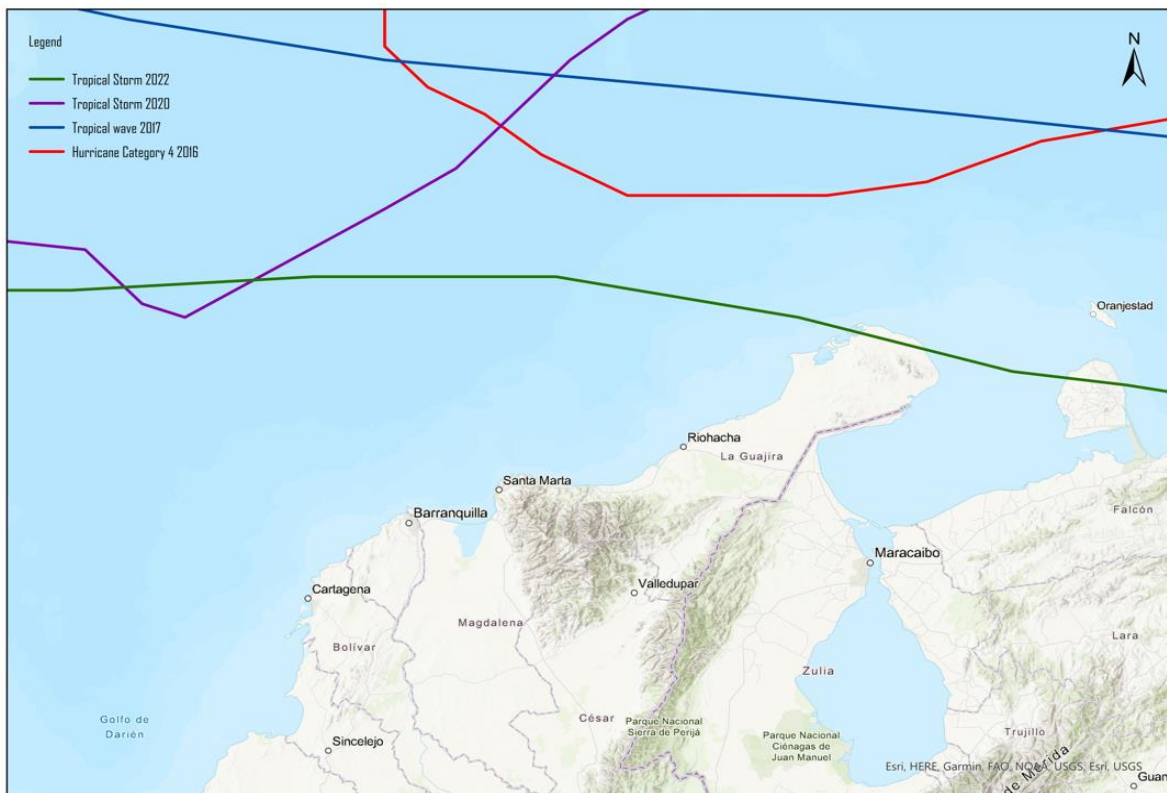

Figure S4. Hurricane routes map.



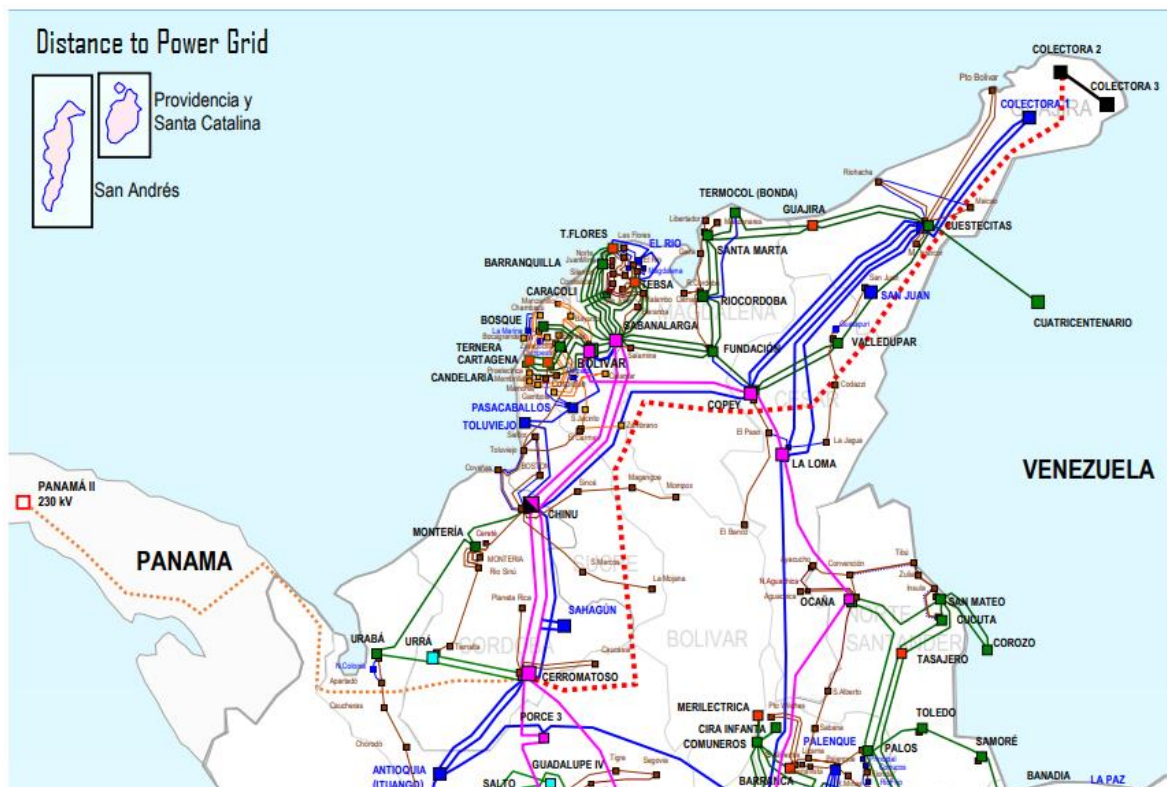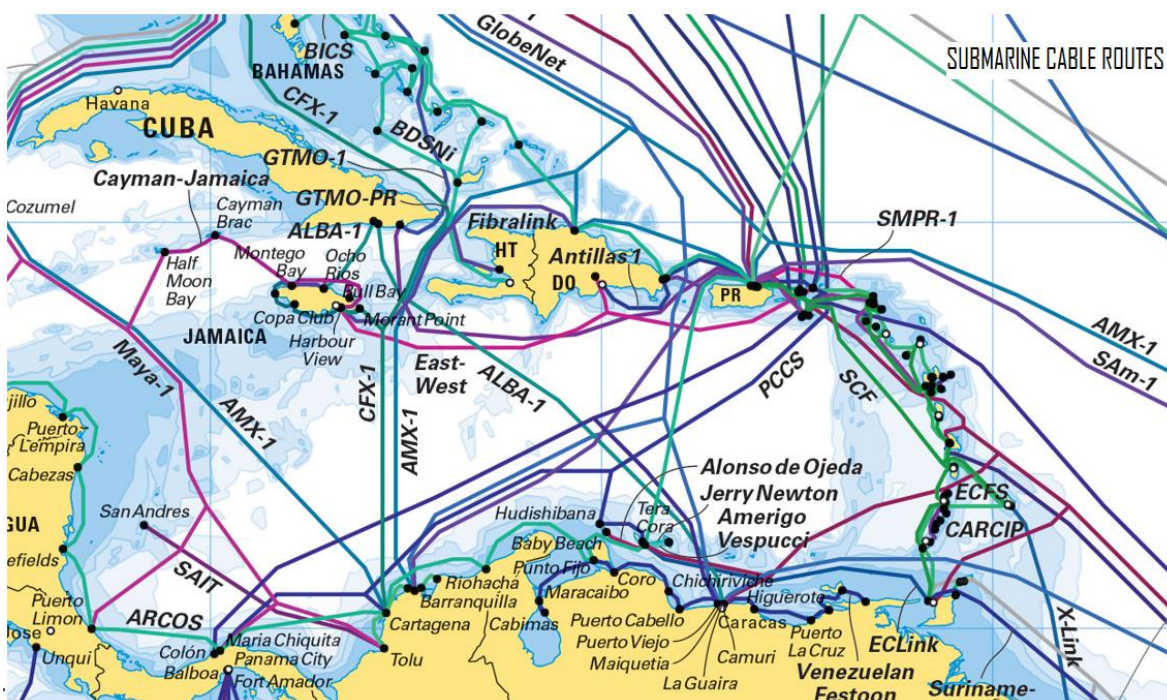

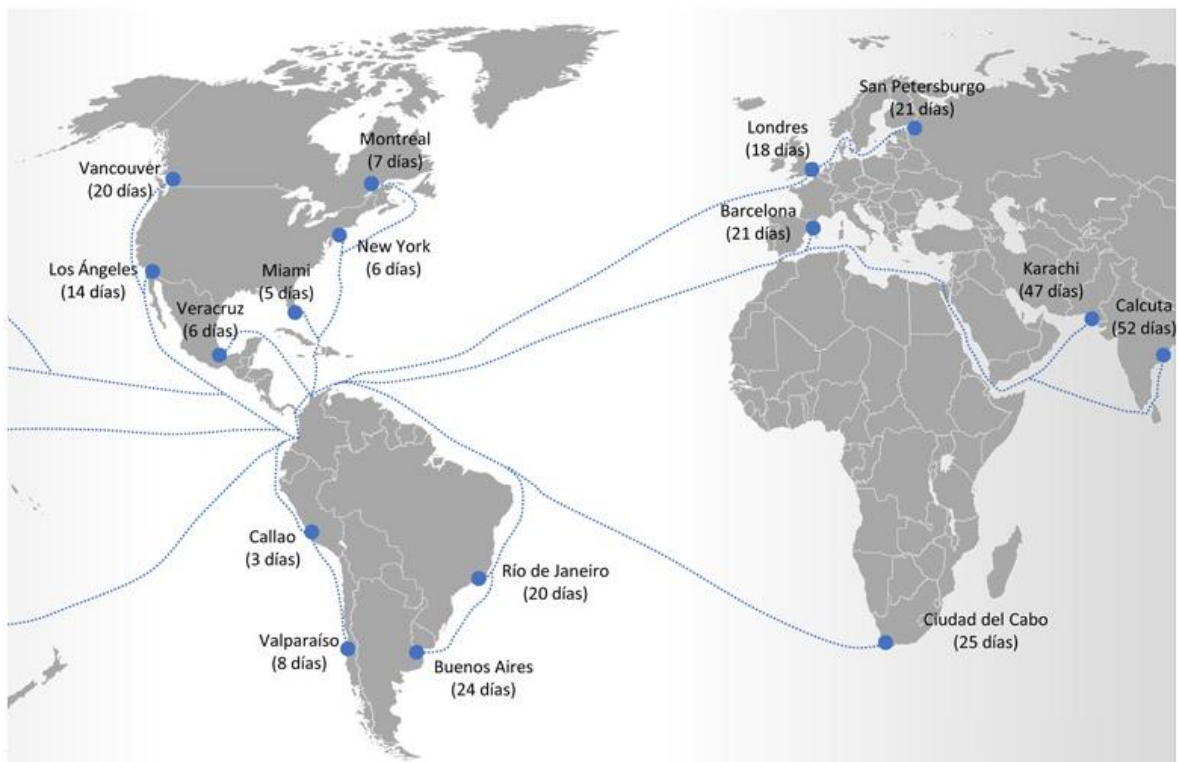

**Figure S7.** Maritime route map.

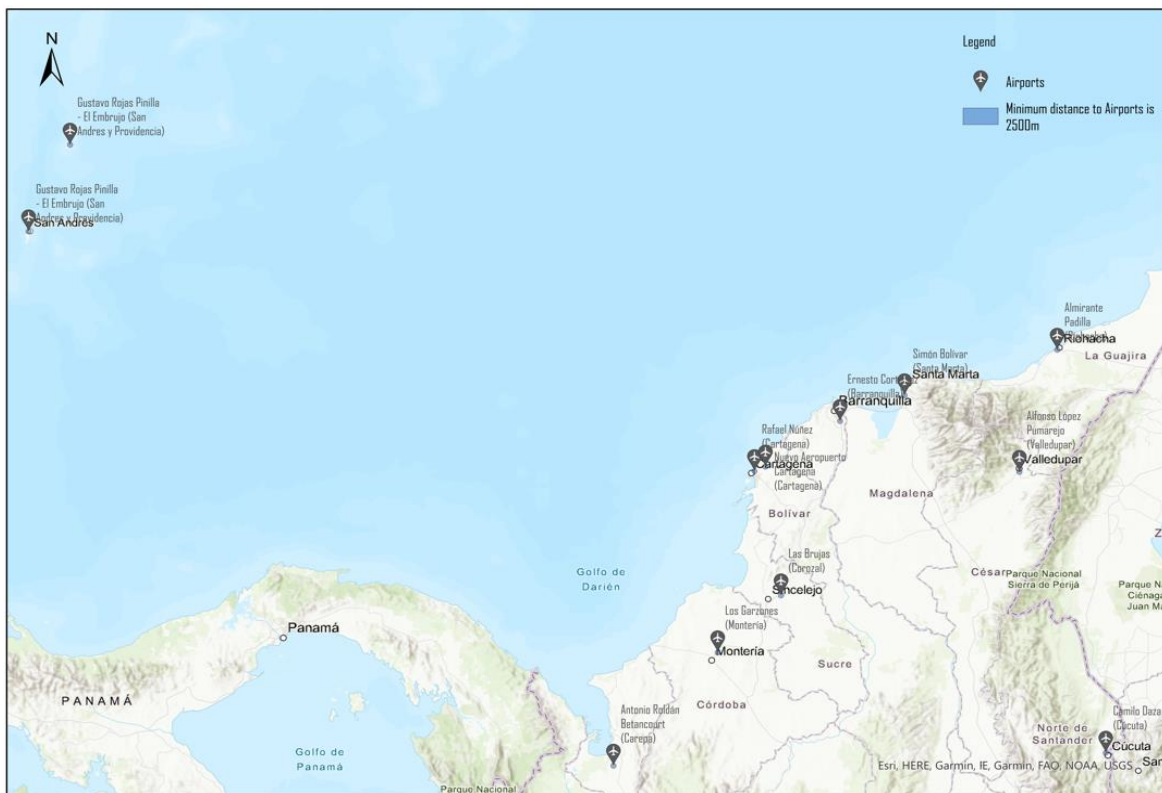

**Figure S8.** Airport map.



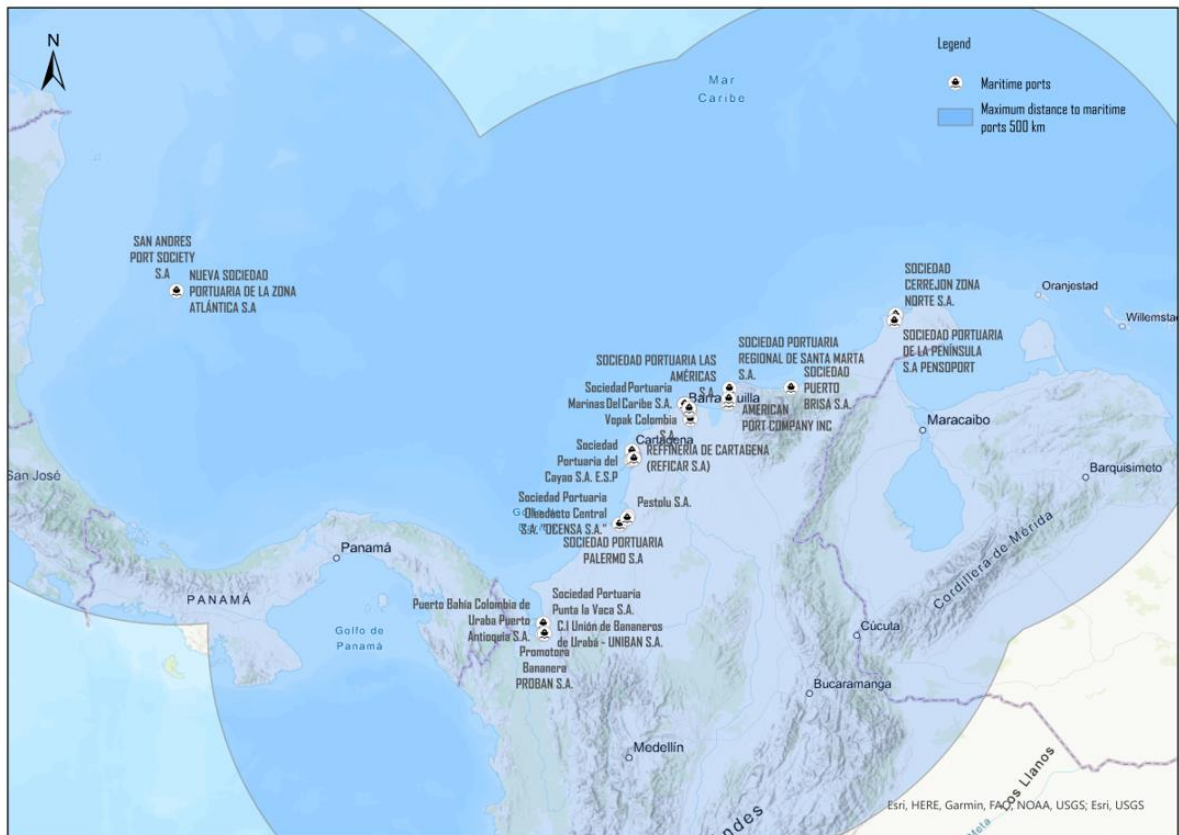

Figure S9. Seaport map.

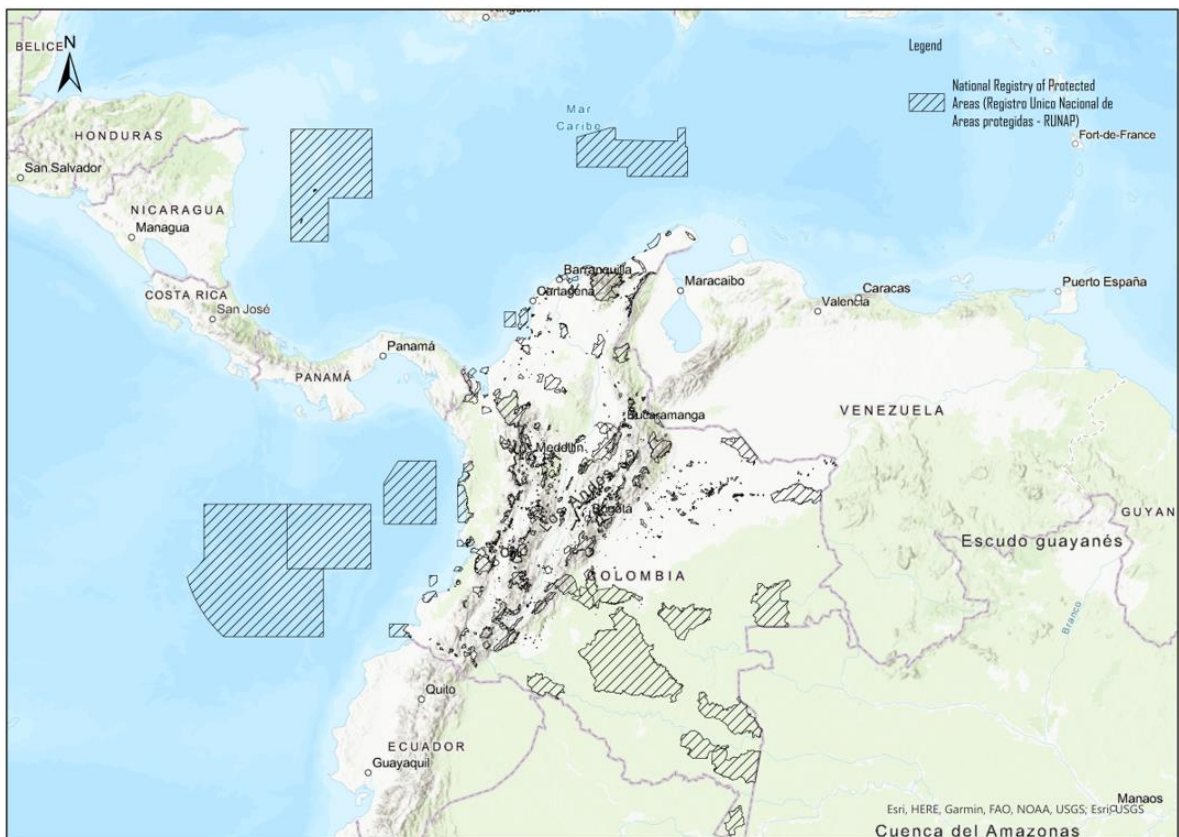

Figure S10. Protected areas map.

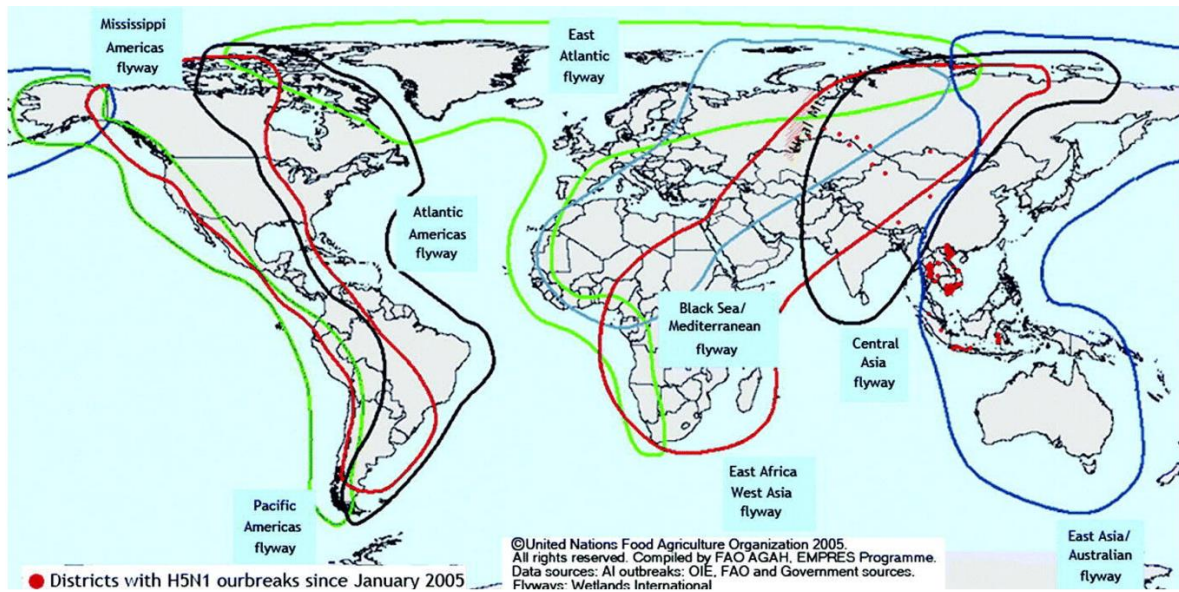

Figure S11. Migratory bird routes map.

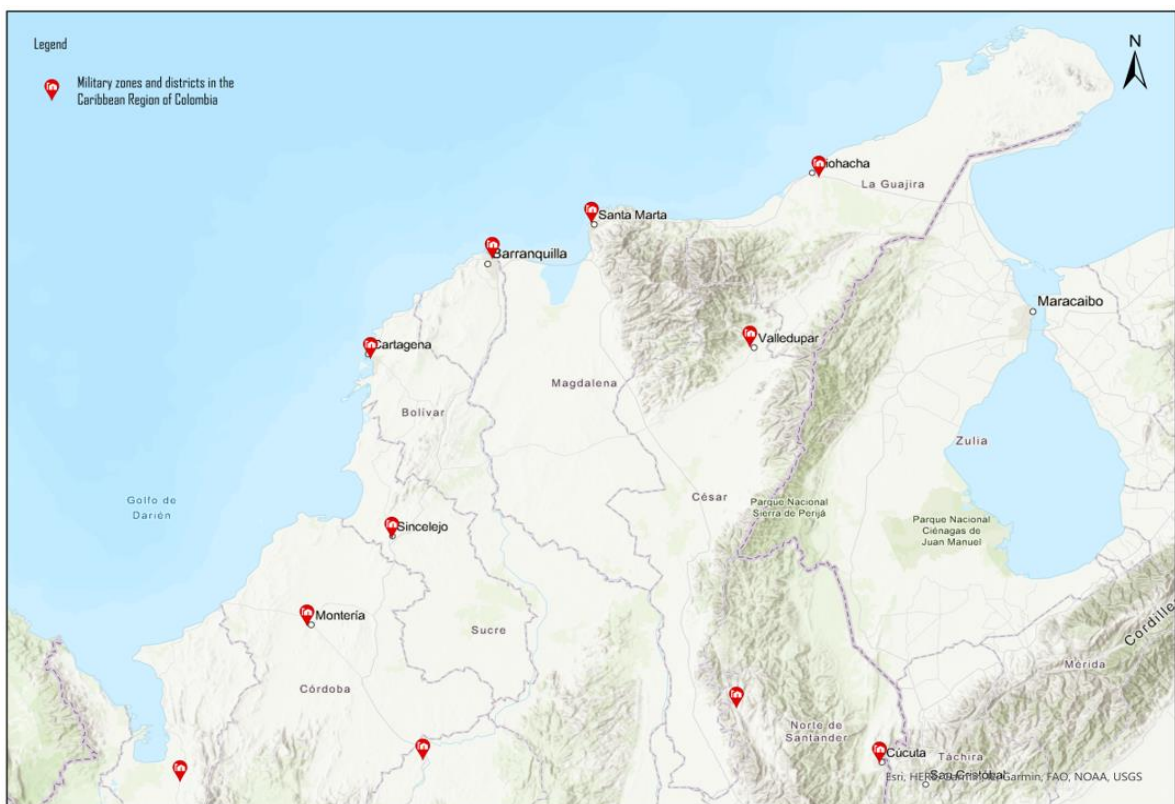

Figure S12. Military zones map.



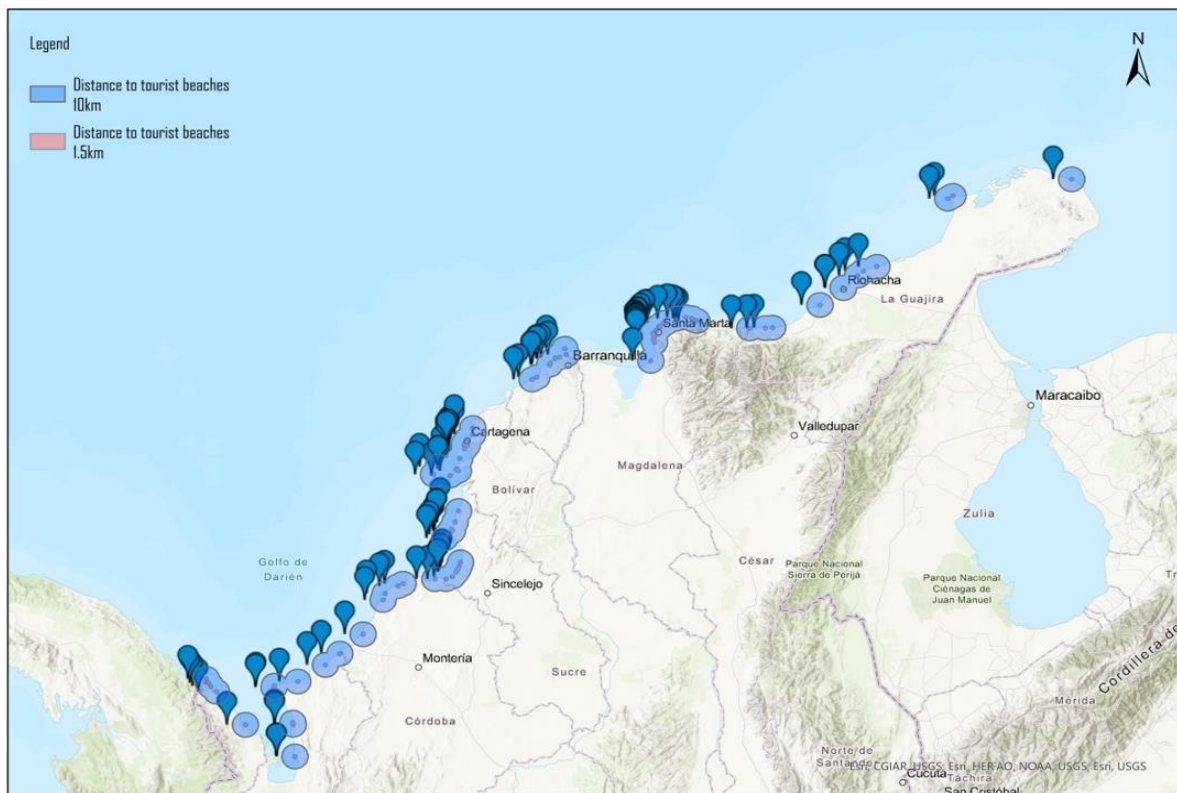

Figure S13. Touristic zones map.

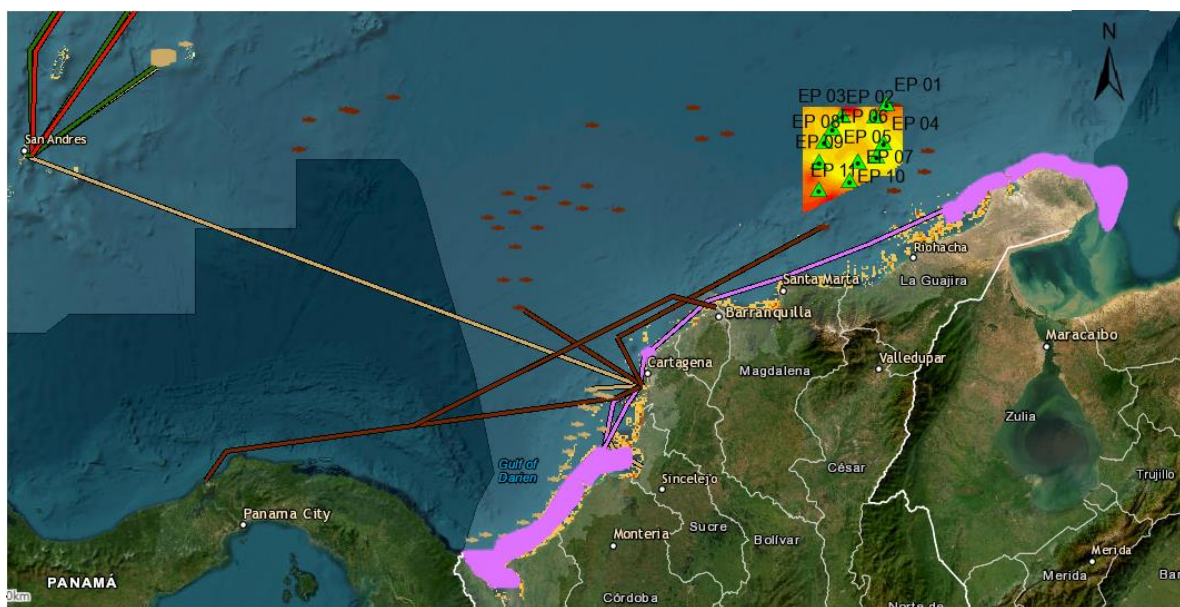

Figure S14 Fishing route map.
